# Supplementary material for: Mix-and-Match Diols: Adjusting Self-Assembly of Micellar Phases in Choline Chloride Eutectics
Source: MDPI journal article supplement (doi:10.3390/cryst12111621), 2022-11-12
Supplement: s1 [file s1]

## Article

# Mix-and-Match Diols: Adjusting Self-Assembly of Micellar Phases in Choline Chloride Eutectics

Oliver S. Hammond <sup>1,2,\*</sup>, Adrian Sanchez-Fernandez <sup>2,†</sup>, Rachel Tyte <sup>2</sup>, Robert Dalglish <sup>3</sup>, Andrew J. Smith <sup>4</sup> and Karen J. Edler <sup>1,2,§</sup>

<sup>1</sup> Centre for Sustainable Chemical Technologies, University of Bath, Claverton Down, Bath BA2 7AY, UK

<sup>2</sup> Department of Chemistry, University of Bath, Claverton Down, Bath BA2 7AY, UK

<sup>3</sup> ISIS Neutron and Muon Source, Science and Technology Facilities Council, Rutherford Appleton Laboratory, Harwell, Oxford OX11 0QX, UK

<sup>4</sup> Diamond Light Source, Science and Technology Facilities Council, Rutherford Appleton Laboratory, Harwell, Oxford OX11 0DE, UK

\* Correspondence: [oliver.s.hammond@bath.edu](mailto:oliver.s.hammond@bath.edu)

† Current address: Department of Materials and Environmental Chemistry, Stockholm University, 114 18 Stockholm, Sweden.

‡ Current address: Biological Chemistry and Molecular Materials Research Center, Universidade de Santiago de Compostela, 15782 Santiago de Compostela, Spain.

§ Current address: Centre for Analysis and Synthesis, Lund University, 223 62 Lund, Sweden.

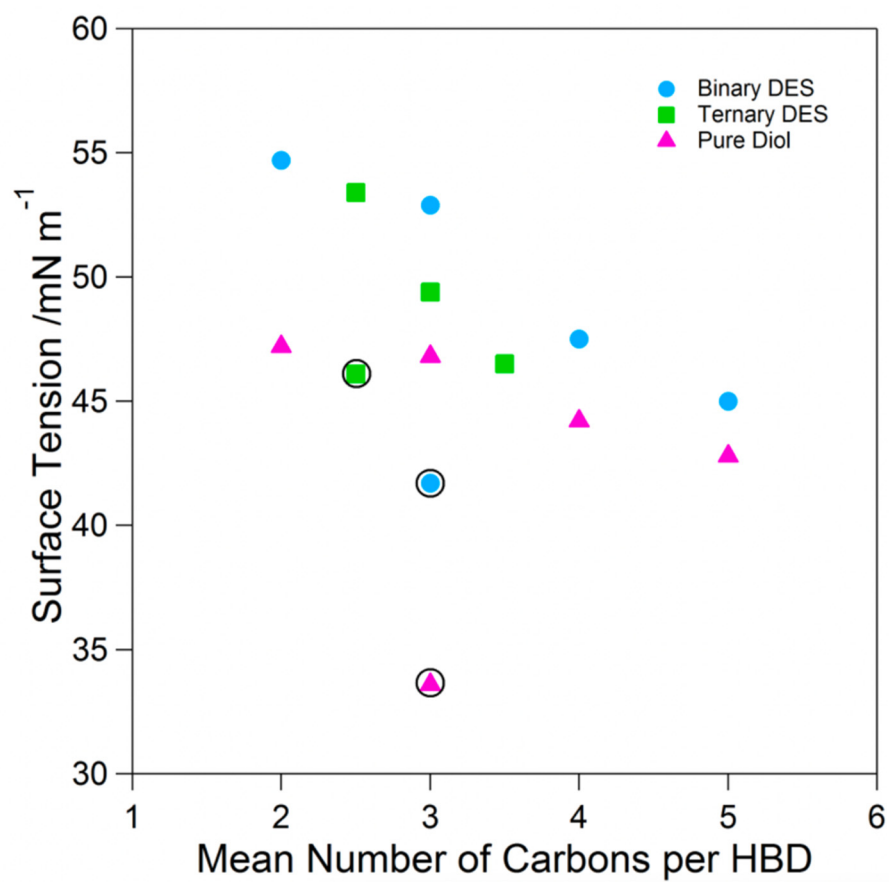

**Figure S1.** The measured surface tension of ternary and binary DES, and the pure diols, as a function of the mean carbon chain length of the HBD. The encircled datapoints correspond with 1,2-propanediol, to distinguish them from 1,3-propanediol.

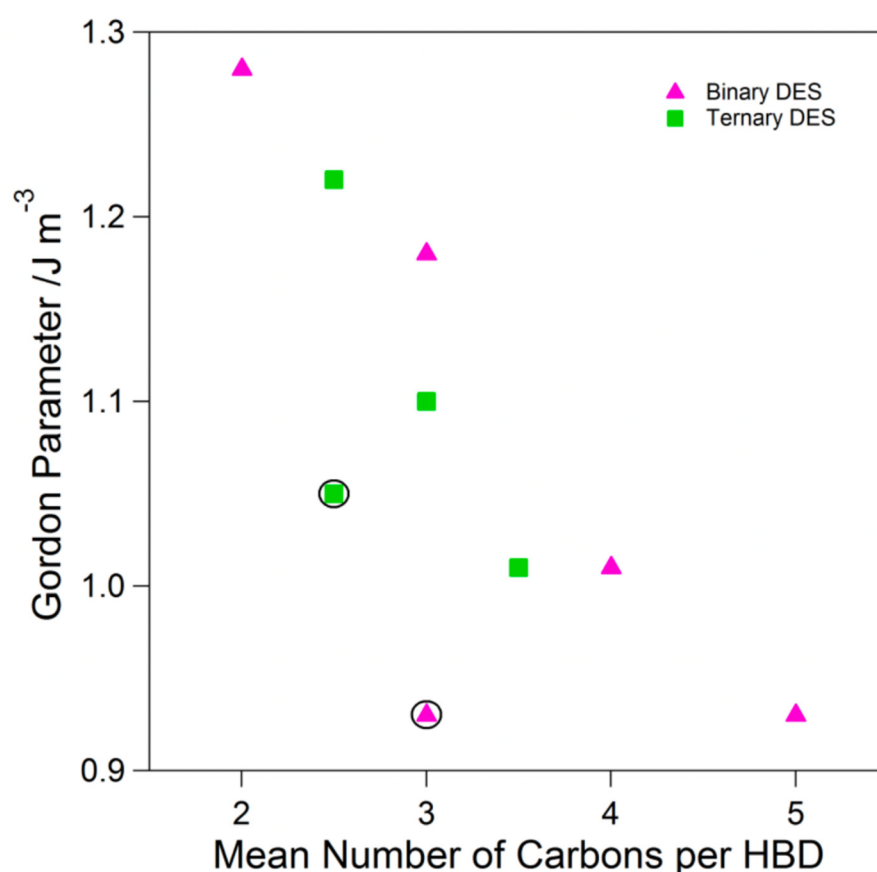

**Figure S2.** Calculated Gordon Parameter of the prepared DES as a function of mean number of HBD alkyl carbon atoms. As in Figure S1, datapoints are encircled to distinguish 1,2-propanediol.

**Table S1.** Calculated neutron scattering length densities (SLDs) for the various protonated and deuterated DES components. SLDs were calculated following the procedure reported by Sanchez-Fernandez *et al.* using their reported individual neutron scattering lengths and molecular volumes.[1] For ethylene glycol, scattering lengths, densities, and molecular volumes were derived from the work of Sears,[2] and Azizian and Bashavard.[3].

| component                                   | Neutron SLD ( $10^{-7} \text{ \AA}^{-2}$ ) |
|---------------------------------------------|--------------------------------------------|
| H-ethaline                                  | 2.75                                       |
| D-ethaline                                  | 59.8                                       |
| H-C <sub>12</sub> TAB                       | -3.9                                       |
| <i>d</i> <sub>34</sub> -C <sub>12</sub> TAB | 70.3                                       |

**Table S2.** Calculated X-ray scattering length densities. X-ray SLDs were calculated using the atomic number of the constituent atoms, and the densities of the liquids. Here, the surfactant was just modelled as the alkyl tail, due to the lack of contrast for the headgroup alone.

| component                       | X-ray SLD ( $10^{-5} \text{ \AA}^{-2}$ ) |
|---------------------------------|------------------------------------------|
| ethaline                        | 1.07                                     |
| 2-propethaline                  | 1.06                                     |
| 3-propethaline                  | 1.06                                     |
| C <sub>12</sub> H <sub>25</sub> | 1.35                                     |

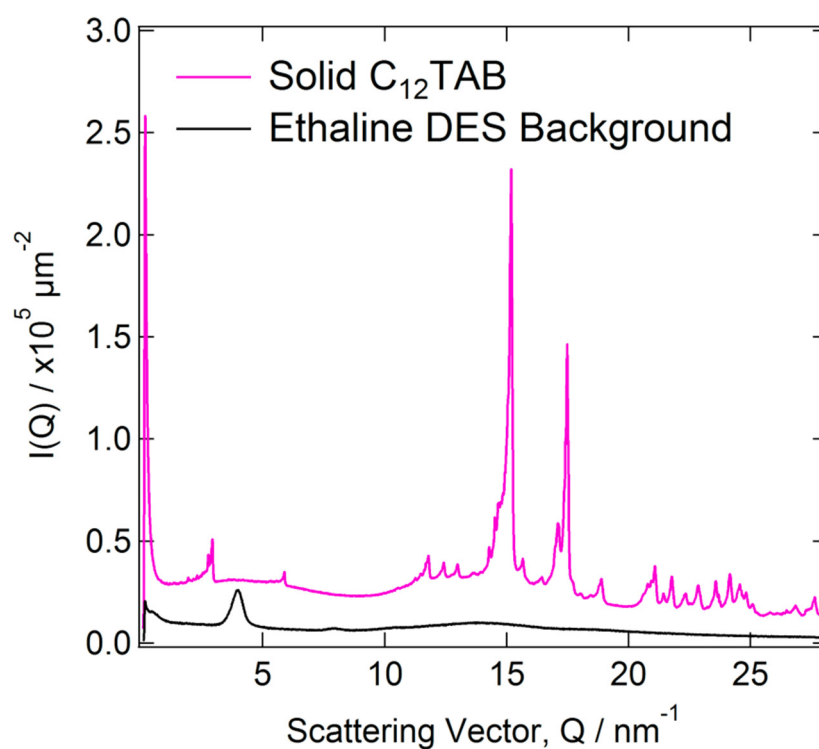

**Figure S3.** SWAXS data collected for reference samples of pure, solid  $\text{C}_{12}\text{TAB}$  powder at  $30^\circ\text{C}$  (pink trace), and pure ethaline DES in a Kapton cell, fully melted at  $60^\circ\text{C}$  (black trace). Note that these SWAXS data are displayed on a linear, not log-log scale.

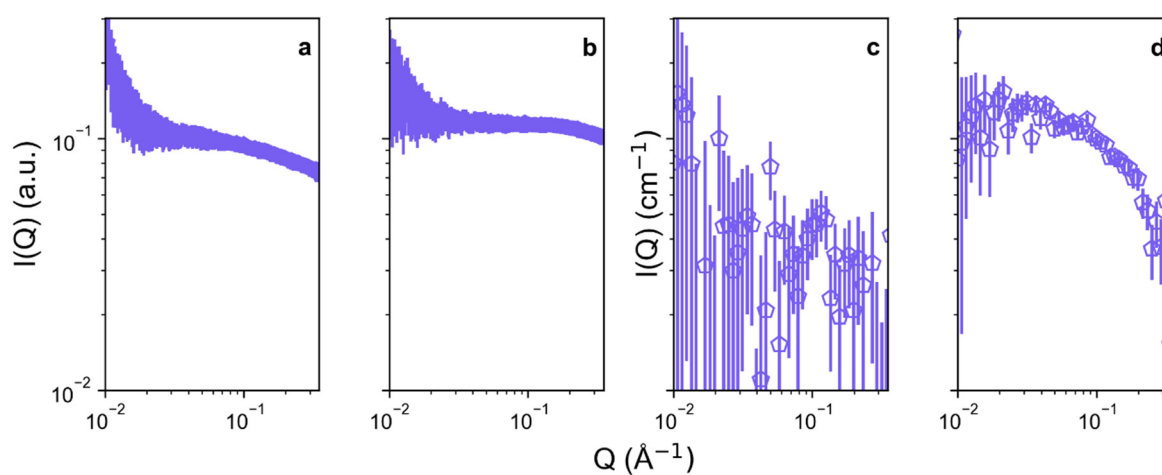

**Figure S4.** SAXS data of 2 wt.%  $\text{C}_{12}\text{TAB}$  in  $\text{ChCl:EG}$  (a); SAXS data of 2 wt.%  $\text{C}_{12}\text{TAB}$  in 2-prope-thaline (b); SANS data of 2 wt.%  $\text{D-C}_{12}\text{TAB}$  in H-ethaline (c); SANS data of 2 wt.% H- $\text{C}_{12}\text{TAB}$  in D-ethaline (d). All data are shown with matching x- and y-axis scaling.

## References

1. Sanchez-Fernandez, A.; Arnold, T.; Jackson, A.J.; Fussell, S.L.; Heenan, R.K.; Campbell, R.A.; Edler, K.J. Micellization of Alkyltrimethylammonium Bromide Surfactants in Choline Chloride:Glycerol Deep Eutectic Solvent. *Phys Chem Chem Phys* **2016**, *18*, 33240–33249, doi:10.1039/C6CP06053F.
2. Sears, V.F. Neutron Scattering Lengths and Cross Sections. *Neutron News* **1992**, *3*, 26–37, doi:10.1080/10448639208218770.
3. Azizian, S.; Bashavard, N. Surface Properties of Diluted Solutions of Cyclohexanol and Cyclopentanol in Ethylene Glycol. *J. Colloid Interface Sci.* **2005**, *282*, 428–433, doi:10.1016/j.jcis.2004.08.135.
